# Supplementary material for: Genetic control of the mouse HDL proteome defines HDL traits, function, and heterogeneity
Source: PubMed Central journal article supplement (PMC6399512; doi:10.1194/jlr.m090555), 2019-01-08
Supplement: 10.1194_M090555_jlr.M090555-1.pdf [file 10.1194_M090555_jlr.M090555-1.pdf]

**Supplemental Material for “Genetic Control of HDL Proteome”.**

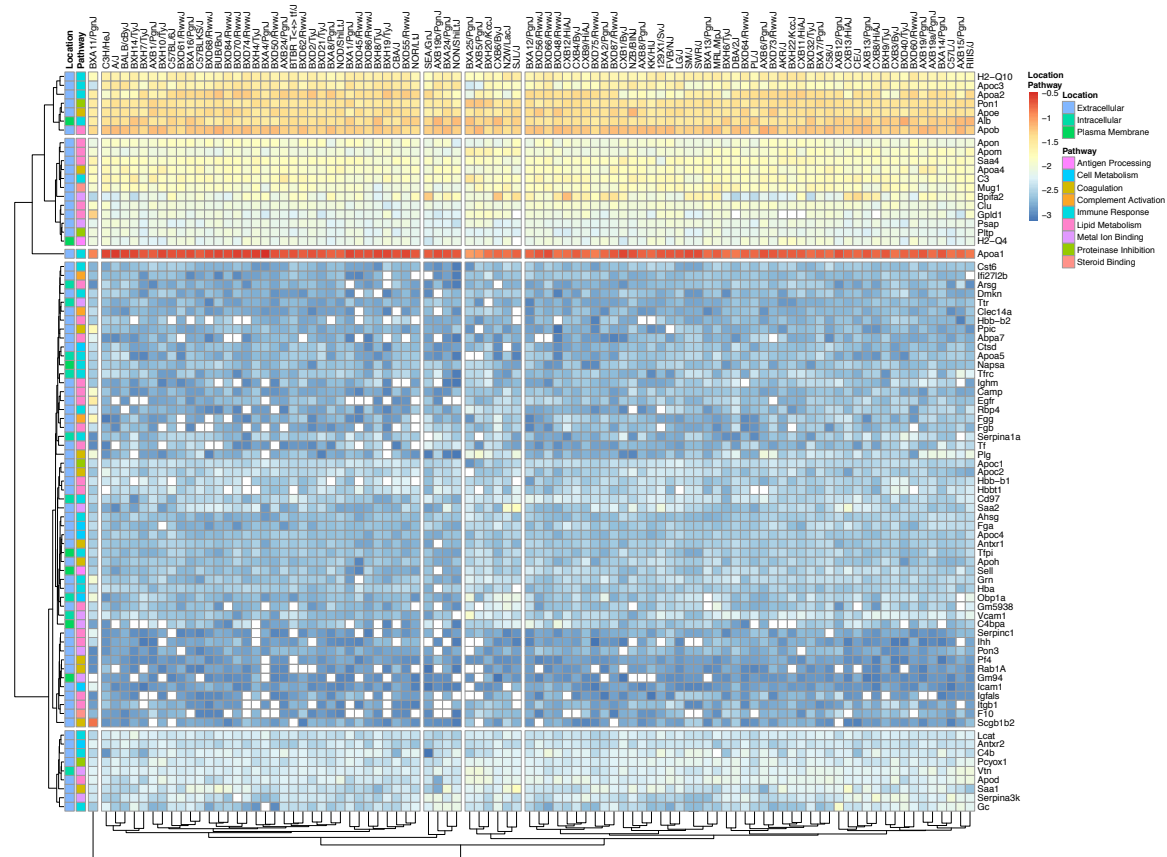

**Supplemental Figure 1:** The heatmap visualization of the HDL protein abundances (calculated as normalized to total PSMs) across 93 strains. The proteins, their biological functions and cellular locations are represented. Logarithmic transformation of the total PSM normalized data has been performed to accommodate the abundance distribution from high (red) to very low (dark blue). White squares represent not available values. Both the proteins and the strains were clustered using Euclidean distances.

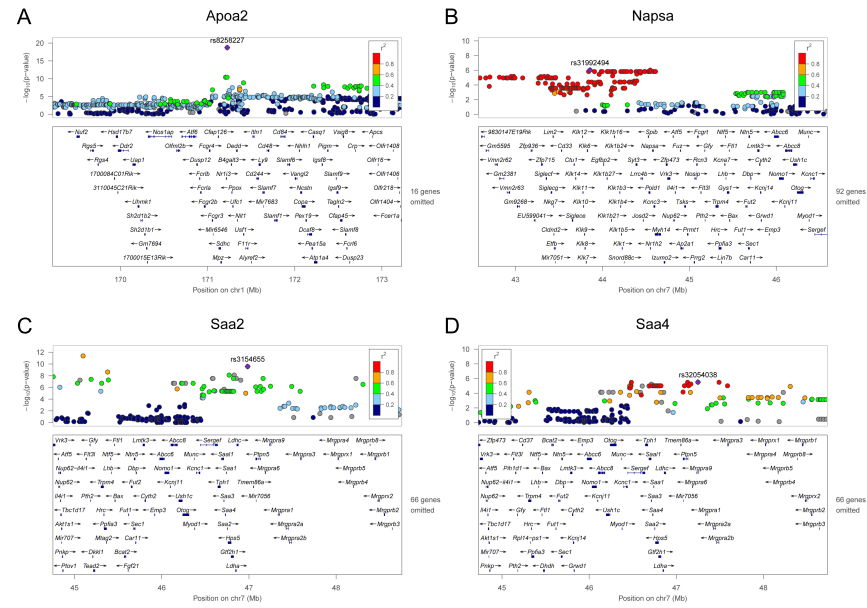

**Supplementary Figure S2.** A representative QTLs for HDL proteins normalized to total PSMs. Loci associated with A) APOA2, B), NAPSA, C) SAA2, D) SAA4. E) F)

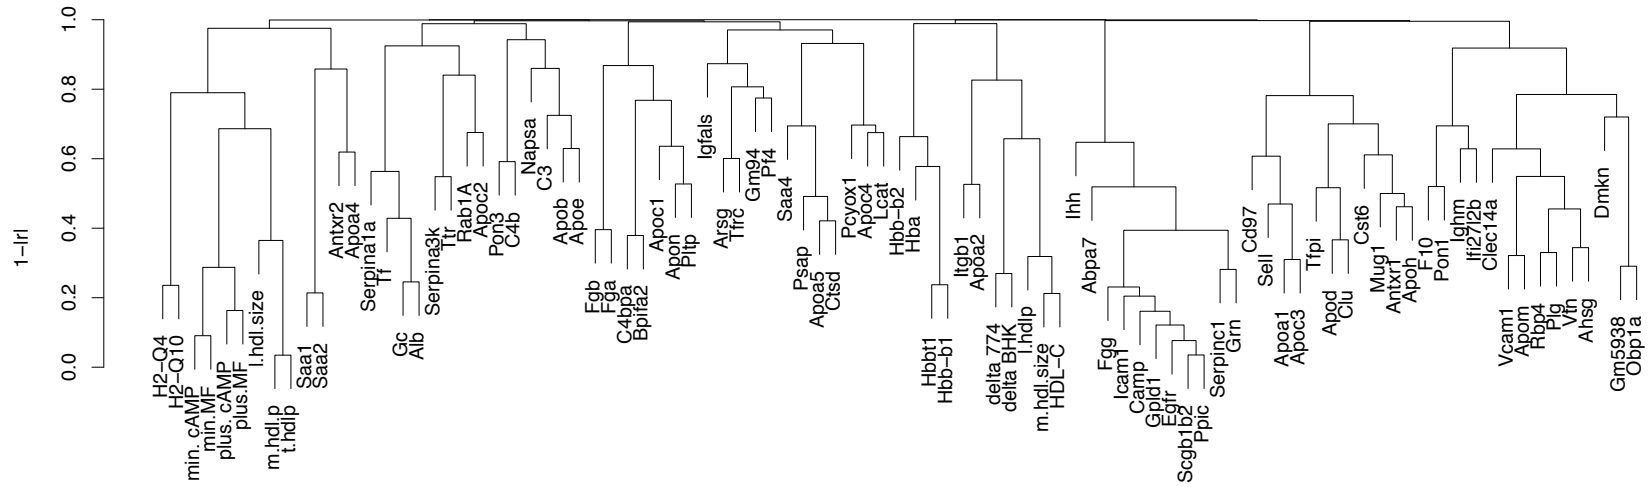

**Supplementary Figure S3.** Hierarchical clustering of the HDL metrics: Proteome (normalized to total PSMs), sterol efflux, particle concentration and size. min.MF, plus.MF, delta.BHK are unstimulated, ABCA1 upregulated and ABCA1 specific sterol efflux from BHK cells respectively. min.cAMP, plus.cAMP, delta.J774 are unstimulated, ABCA1 upregulated and ABCA1 specific sterol efflux from J774 cells respectively. m.hdlp and t.hdlp are medium size and total HDL particle concentration. m.hdl.size and l.hdl.size are medium and large HDL sizes respectively. The correlation structure was determined using pearson correlation. The protein functional groups were curated from DAVID, KEGG, Panther, and Uniprot databases.

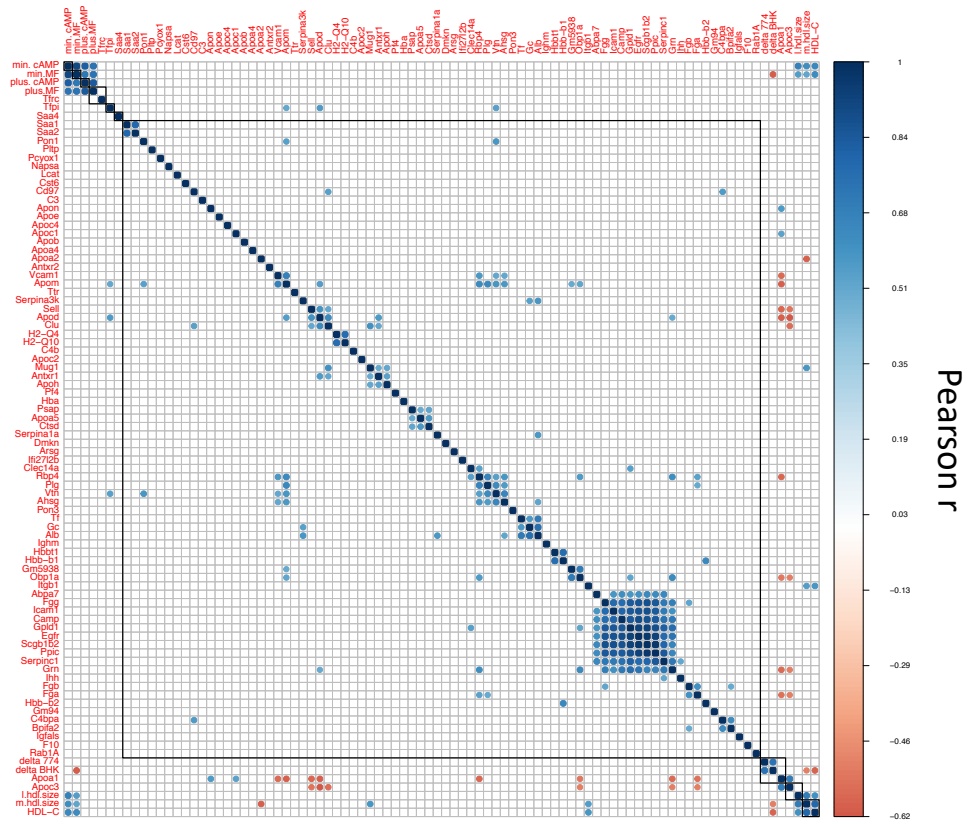

**Supplementary Figure S4.** The relationship between HDL metrics is represented by a correlation matrix. Total of 8,100 correlations were observed. Among which 380 Pearson correlation with Bonferroni-Holm correction having  $|r|$  values  $>0.5$  (positive in bleu, negative in red) that are  $P < 0.05$  are presented.

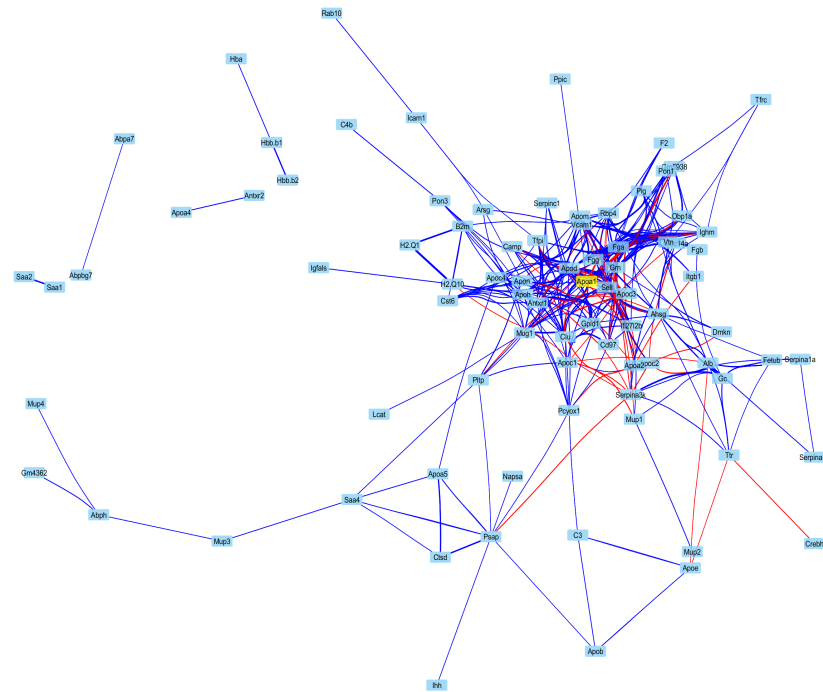

**Supplemental Figure S5.** Cytoscape visualization of all the protein-protein interactions presented in Supplemental Figure 2. Self-loops were removed and edges were bundled for clarity. Node locations are assigned using an edge-weighted spring-embedded layout algorithm using the negative log of the Benjamini-Hochberg corrected p-value, and edge transparency is directly proportional to the same value. Red: negative correlation, Blue: positive correlation. Shorter distances indicate stronger correlations.

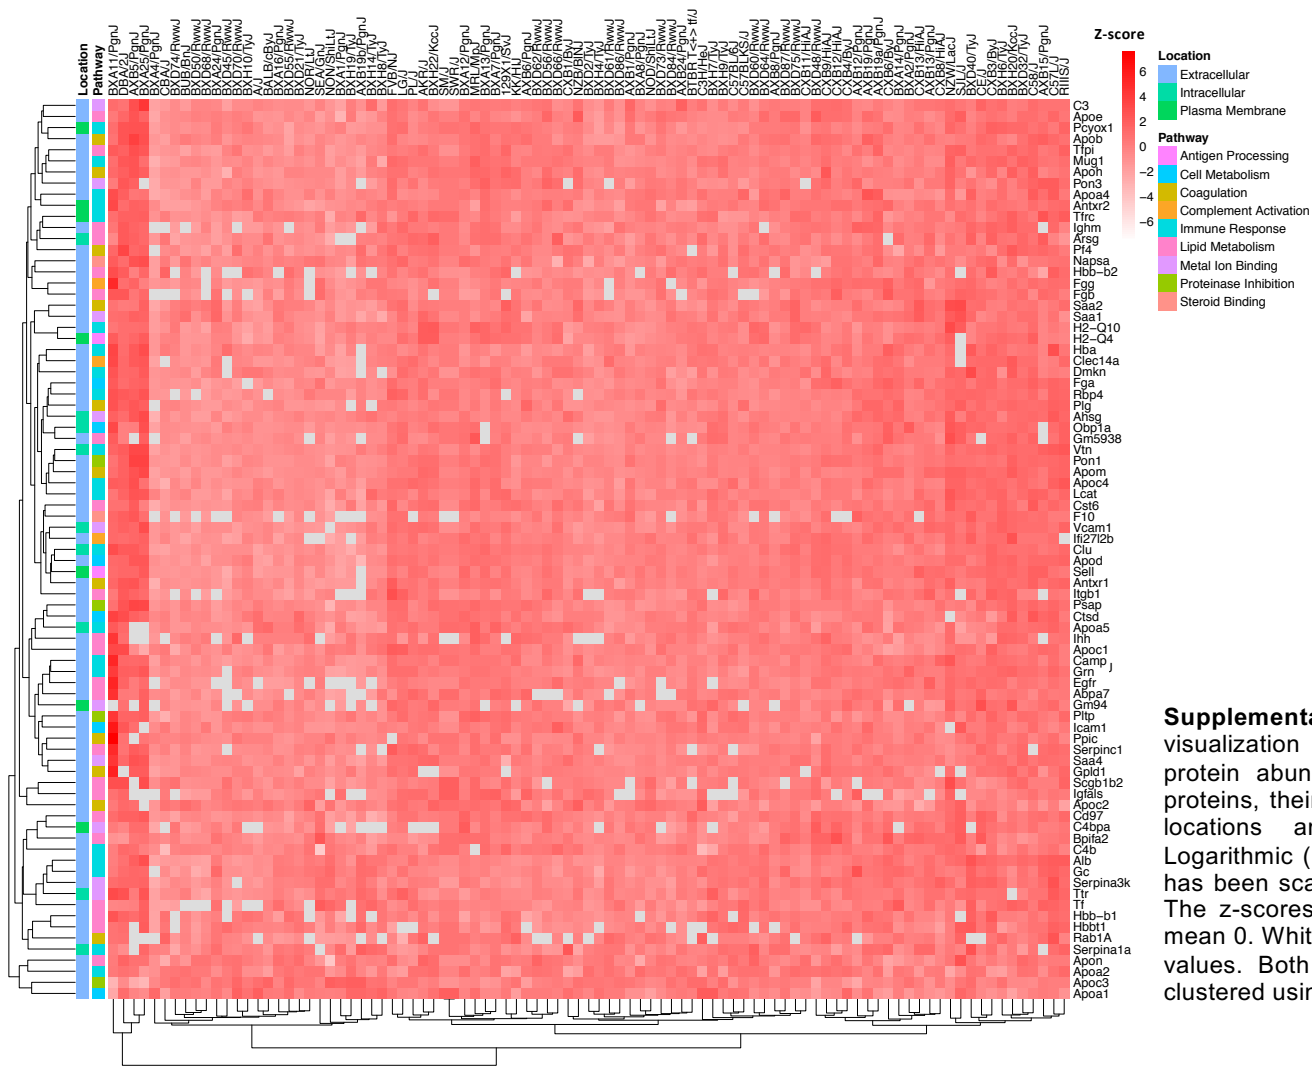

**Supplemental Figure 8:** The heatmap visualization of the yeast normalized HDL protein abundances across 93 strains. The proteins, their biological functions and cellular locations are represented. Following a Logarithmic (base 10) transformation the data has been scaled and centered across strains. The z-scores indicate the deviation from the mean 0. White squares represent not available values. Both the proteins and the strains were clustered using Euclidean distances.

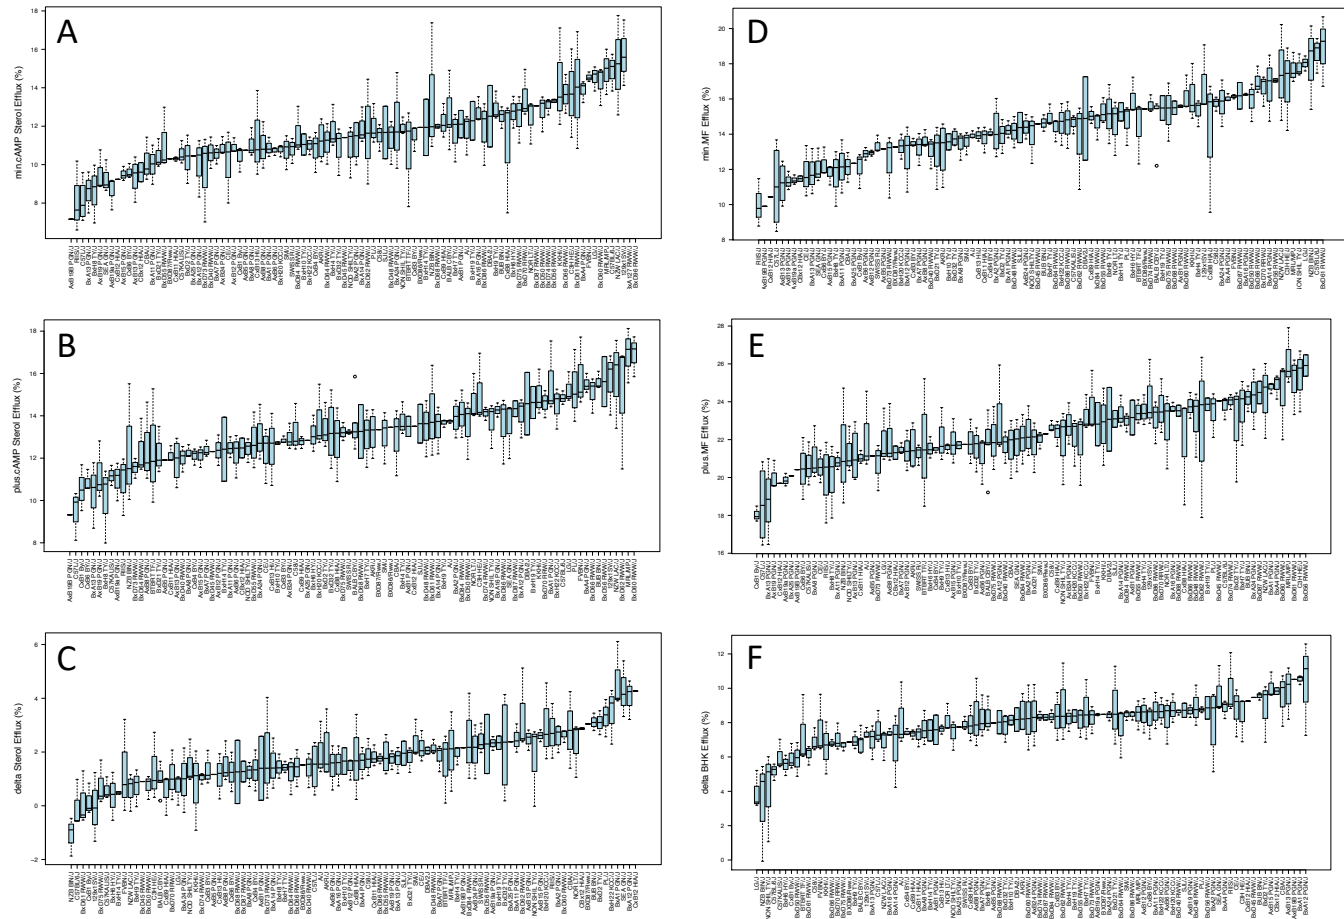

**Supplemental Figure S6.** Sterol Efflux distribution across strains. min.cAMP, plus.cAMP, delta.J774 are unstimulated, ABCA1 upregulated and ABCA1 specific sterol efflux from J774 cells respectively (-C). min.MF, plus.MF, delta.BHK are unstimulated, ABCA1 upregulated and ABCA1 specific sterol efflux from BHK cells respectively (D-F). All the measures are in duplicate from PEG depleted plasma collected from 1-5 mice for each strain.



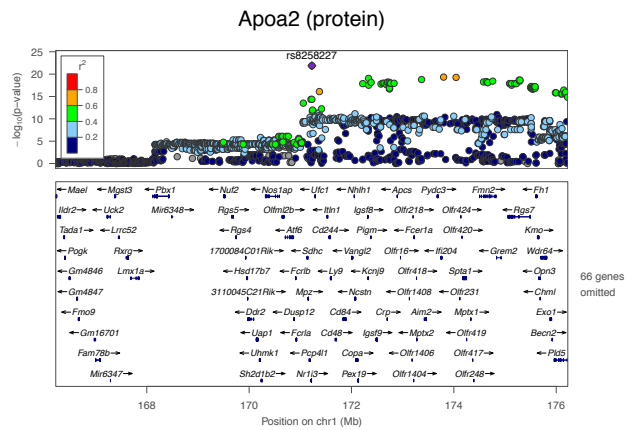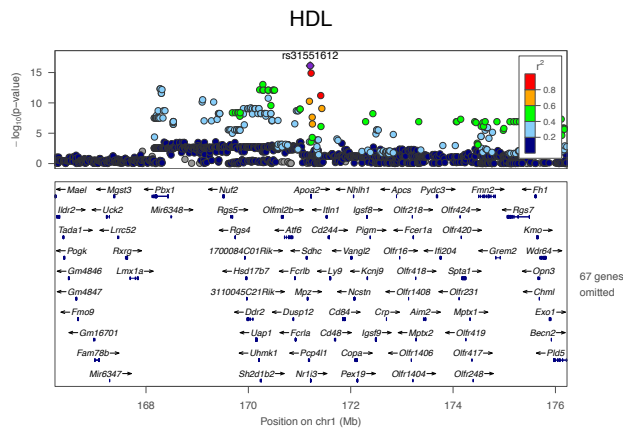

**Supplemental Figure S7. Overlap of the loci regulating APOA2 and HDL-C.**

Supplemental Table S2. Distal hepatic eQTL and HDL protein pQTL

|             |                           | eQTL       |                 |          | pQTL       |                 |          |
|-------------|---------------------------|------------|-----------------|----------|------------|-----------------|----------|
| Gene symbol | gene location             | rsID       | location        | pvalue   | rsID       | location        | pvalue   |
| Acta2       | chr19:34241091-34255336   | rs33249546 | chr12:107784606 | 3.19E-06 | rs26854790 | chr11:34507244  | 1.79E-05 |
| Ahsg        | chr16:22892042-22899438   | -          | -               | -        | rs27025295 | chr11:102513585 | 6.96E-05 |
| Alb         | chr5:90460889-90476603    | rs31797608 | chr15:85144357  | 8.43E-06 | rs32467664 | chr4:149728061  | 8.13E-05 |
| Antxr1      | chr6:87133854-87335775    | rs36880152 | chr6:81882442   | 1.93E-06 | rs50132559 | chr19:33023700  | 3.38E-05 |
| Antxr2      | chr5:97884688-98030962    | rs28126164 | chr4:89835209   | 2.57E-06 | rs33293355 | chr15:44429881  | 1.49E-05 |
| Apoa1       | chr9:46228580-46230466    | rs32772192 | chr1:181446747  | 1.59E-06 | rs36722533 | chr5:114054566  | 1.76E-04 |
| Apoa2       | chr1:171225054-171226379  | rs33710425 | chr9:72868067   | 9.06E-07 | rs3686444  | chr1:176311409  | 4.58E-14 |
| Apoa4       | chr9:46240696-46243459    | rs30020828 | chr18:80220795  | 3.86E-07 | rs33627742 | chr7:136794307  | 6.13E-06 |
| Apoa5       | chr9:46268633-46271919    | rs32391759 | chr7:12925987   | 7.83E-06 | rs27669302 | chr2:178650304  | 1.35E-06 |
| Apob        | chr12:7977648-8016835     | -          | -               | -        | rs36252881 | chr7:17157035   | 2.01E-05 |
| Apoc1       | chr7:19689484-19692658    | rs29990911 | chr9:46573895   | 7.61E-08 | rs27318817 | chr2:161825532  | 1.16E-04 |
| Apoc2       | chr7:19671584-19681423    | rs28126164 | chr4:89835209   | 3.01E-06 | rs6152725  | chr15:40403951  | 3.58E-08 |
| Apoc3       | chr9:46232933-46235636    | rs33130644 | chr17:77057385  | 1.19E-06 | rs27103735 | chr11:99579260  | 2.54E-05 |
| Apoc4       | chr7:19678094-19681416    | rs30918547 | chr1:135837872  | 1.38E-09 | rs26948185 | chr11:48065640  | 4.90E-05 |
| Apod        | chr16:31296192-31314808   | -          | -               | -        | rs27964211 | chr2:75062346   | 3.69E-04 |
| Apoe        | chr7:19696109-19699166    | rs30108818 | chr3:150771887  | 1.09E-06 | rs28224497 | chr11:42181156  | 2.09E-04 |
| Apoh        | chr11:108343354-108414396 | rs13481215 | chr11:107133182 | 1.65E-15 | rs30649661 | chr14:85871809  | 2.77E-05 |
| Apom        | chr17:35128997-35132050   | rs33090761 | chr17:33672870  | 2.50E-10 | rs27642220 | chr2:181174626  | 2.01E-04 |
| Apon        | chr10:128254131-128255901 | rs32101443 | chr5:112119471  | 6.14E-06 | rs29774020 | chr18:58212937  | 2.38E-06 |
| Arsg        | chr11:109473374-109573330 | rs36419130 | chr19:27237192  | 1.91E-06 | rs29057199 | chrX:59442756   | 3.85E-04 |
| B2m         | chr2:122147686-122153083  | rs27438827 | chr2:120924297  | 1.69E-15 | rs3686227  | chr1:185787602  | 8.91E-04 |
| Camp        | chr9:109847375-109849456  | rs26926153 | chr11:8092518   | 2.70E-07 | rs36661068 | chr3:97125819   | 6.01E-05 |
| Cd97        | chr8:83723251-83741326    | -          | -               | -        | rs32535471 | chr7:36356962   | 2.33E-06 |
| Clec14a     | chr12:58264720-58269258   | rs36279328 | chr15:10935337  | 3.06E-06 | rs31569850 | chr15:45550945  | 2.90E-04 |
| Clu         | chr14:65968483-65981548   | rs46776915 | chr1:76977058   | 3.43E-08 | rs3148702  | chr7:30320377   | 2.88E-04 |
| Creb3l3     | chr10:81084324-81098874   | rs3090957  | chr16:45620289  | 2.64E-07 | rs30692446 | chr6:121728413  | 3.95E-06 |
| Cst6        | chr19:5344705-5349574     | -          | -               | -        | rs27419289 | chr2:92090332   | 3.54E-07 |
| Ctsd        | chr7:142371148-142388038  | -          | -               | -        | rs33582176 | chr12:114598004 | 1.84E-04 |
| Dmkn        | chr7:30763756-30781066    | -          | -               | -        | rs3716768  | chr15:42625082  | 2.21E-04 |
| F2          | chr2:91625329-91636407    | rs45837563 | chr8:92821223   | 6.36E-07 | rs29807878 | chr3:30317921   | 3.74E-04 |
| Fetub       | chr16:22918382-22939766   | rs45734186 | chr15:48796498  | 3.08E-07 | rs38497950 | chr9:45456361   | 7.32E-04 |
| Fga         | chr3:83026153-83033615    | rs27373341 | chr2:151322820  | 4.90E-06 | rs49665653 | chr10:15717736  | 1.08E-04 |
| Fgb         | chr3:83042303-83049790    | rs27373341 | chr2:151322820  | 9.32E-08 | rs27013471 | chr11:119119713 | 1.04E-04 |
| Fgg         | chr3:83007896-83015049    | rs31600615 | chr15:79335511  | 6.14E-07 | rs36661068 | chr3:97125819   | 5.73E-06 |
| Gc          | chr5:89417511-89457898    | rs27037797 | chr11:96844820  | 3.72E-06 | rs31223648 | chr1:153790065  | 3.56E-05 |
| Gpld1       | chr13:24943152-24990753   | -          | -               | -        | rs36661068 | chr3:97125819   | 7.90E-05 |
| Grn         | chr11:102430315-102437048 | -          | -               | -        | rs27368358 | chr2:92020480   | 3.63E-04 |

|           |                           |            |                 |          |            |                 |          |
|-----------|---------------------------|------------|-----------------|----------|------------|-----------------|----------|
| H2-Q10    | chr17:35470089-35474563   | rs13482968 | chr17:37131683  | 8.59E-41 | rs36858919 | chr19:13828213  | 5.05E-07 |
| Icam1     | chr9:21015960-21028797    | rs37594915 | chr19:15778814  | 3.39E-06 | rs36661068 | chr3:97125819   | 3.17E-04 |
| Igfals    | chr17:24878770-24882008   | rs47878742 | chr17:37087269  | 5.02E-06 | rs32144076 | chr7:110386487  | 1.81E-06 |
| Ihh       | chr1:74945319-74951651    | -          | -               | -        | rs4184357  | chr16:48902971  | 2.44E-04 |
| Itgb1     | chr8:128685654-128733200  | rs51374406 | chr12:64789105  | 3.63E-06 | rs50104850 | chr6:115450887  | 6.70E-05 |
| Lcat      | chr8:105939551-105943382  | -          | -               | -        | rs27677536 | chr2:181265611  | 1.24E-05 |
| Mug1      | chr6:121838541-121889057  | -          | -               | -        | rs27979523 | chr2:75221995   | 4.38E-05 |
| Napsa     | chr7:44572432-44586862    | -          | -               | -        | rs32164737 | chr7:29552540   | 7.48E-06 |
| Obp1a     | chrX:78085505-78091374    | -          | -               | -        | rs28277205 | chr2:174386694  | 2.91E-04 |
| Pcyox1    | chr6:86386006-86397150    | -          | -               | -        | rs27529991 | chr4:125355058  | 4.68E-05 |
| Pf4       | chr5:90772435-90773381    | -          | -               | -        | rs27642374 | chr2:181116314  | 5.39E-05 |
| Plg       | chr17:12378609-12419384   | rs27619641 | chr4:135387675  | 1.75E-06 | rs33468024 | chr12:113826839 | 7.47E-06 |
| Pltp      | chr2:164839518-164857711  | rs38870920 | chr9:49969825   | 2.17E-06 | rs27971647 | chr2:71119784   | 1.38E-04 |
| Pon1      | chr6:5168090-5193946      | rs31124585 | chr3:42161472   | 6.42E-06 | rs27499799 | chr4:120761555  | 1.61E-05 |
| Pon3      | chr6:5220852-5256286      | -          | -               | -        | rs29829269 | chr6:12796975   | 5.41E-06 |
| Ppic      | chr18:53406341-53418007   | rs29850615 | chr18:7766071   | 1.59E-08 | rs36661068 | chr3:97125819   | 2.90E-05 |
| Psap      | chr10:60277627-60302594   | rs29170614 | chr12:100443804 | 3.15E-06 | rs27516360 | chr4:120659954  | 2.75E-05 |
| Rab10     | chr12:3247430-3309969     | rs31977226 | chr7:24356524   | 8.81E-07 | rs33497497 | chr5:25445855   | 1.51E-04 |
| Rbp4      | chr19:38116620-38125321   | rs29232569 | chr13:95538693  | 7.75E-07 | rs47135895 | chr12:117094100 | 1.88E-04 |
| Saa1      | chr7:46740501-46742980    | -          | -               | -        | rs36355916 | chr19:16510334  | 1.68E-07 |
| Saa2      | chr7:46751833-46754314    | rs45654115 | chr14:121548049 | 1.23E-06 | rs36608891 | chr18:64690680  | 5.44E-12 |
| Saa4      | chr7:46728017-46732543    | rs29737430 | chr9:41680673   | 5.68E-09 | rs27665189 | chr2:180274844  | 3.00E-05 |
| Sell      | chr1:164062076-164080785  | -          | -               | -        | rs27964211 | chr2:75062346   | 8.22E-05 |
| Serpina3k | chr12:104338486-104345741 | rs27900188 | chr2:48696367   | 7.36E-08 | rs37260091 | chr10:14030671  | 2.44E-05 |
| Serpinc1  | chr1:160978606-161003010  | rs50125449 | chr14:47256172  | 8.73E-06 | rs28042579 | chr2:59173843   | 5.34E-04 |
| Tfpi      | chr2:84432855-84476775    | rs27398927 | chr2:89930200   | 6.84E-06 | rs32170249 | chr7:46464534   | 1.36E-04 |
| Tfrc      | chr16:32608920-32632794   | rs37655376 | chr18:70771803  | 5.53E-07 | rs29339441 | chr10:120721000 | 3.00E-06 |
| Ttr       | chr18:20665250-20674324   | rs31496994 | chr7:136390392  | 7.02E-07 | rs29051466 | chrX:67329987   | 8.81E-04 |
| Vcam1     | chr3:116110020-116129688  | -          | -               | -        | rs29055848 | chrX:60937611   | 5.82E-05 |
| Vtn       | chr11:78499091-78502324   | rs32054038 | chr7:47248355   | 1.47E-07 | rs27642377 | chr2:181116206  | 5.65E-05 |

Supplemental Table S3. Local adipose eQTL and HDL apoprotein pQTL

| Gene symbol | Gene location            | local eQTL |                |          | local pQTL |                |          |
|-------------|--------------------------|------------|----------------|----------|------------|----------------|----------|
|             |                          | rsID       | location       | p-value  | rsID       | location       | p-value  |
| Apoa2       | chr1:171225054-171226379 | -          | -              | -        | rs8258227  | chr1:171225758 | 1.63E-22 |
| Apoc1       | chr7:19689484-19692658   | rs32424040 | chr7:19760563  | 4.98E-04 | -          | -              | -        |
| Apoc2       | chr7:19671584-19681423   | rs32424040 | chr7:19760563  | 9.75E-05 | rs32420618 | chr7:19571593  | 7.92E-05 |
| Apoc3       | chr9:46232933-46235636   | rs30024591 | chr9:45614034  | 1.77E-07 | rs48945377 | chr9:46673334  | 5.41E-04 |
| Cd97        | chr8:83723251-83741326   | rs6244441  | chr8:83006485  | 1.63E-05 | -          | -              | -        |
| Cst6        | chr19:5344705-5349574    | rs37117750 | chr19:5255634  | 4.61E-04 | -          | -              | -        |
| H2-Q10      | chr17:35470089-35474563  | rs8239672  | chr17:34659014 | 6.21E-11 | rs33061052 | chr17:35078160 | 2.99E-07 |
| Saa1        | chr7:46740501-46742980   | -          | -              | -        | rs3154655  | chr7:46985523  | 1.19E-05 |
| Saa2        | chr7:46751833-46754314   | -          | -              | -        | rs3154655  | chr7:46985523  | 1.09E-10 |
| Ttr         | chr18:20665250-20674324  | rs52621808 | chr18:19774644 | 4.10E-04 | -          | -              | -        |
| Vcam1       | chr3:116110020-116129688 | rs30451190 | chr3:117000199 | 7.10E-04 | -          | -              | -        |

Supplemental Table S4. Potential causal interactions based on local pQTL analyses

| Gene symbol | gene location             | rsID       | SNP location   | p-value  | effect size |
|-------------|---------------------------|------------|----------------|----------|-------------|
| Apoc2       | chr7:19671584-19681423    | rs32420618 | chr7:19571593  | 2.19E-04 | 0.0132712   |
| Saa2        | chr7:46751833-46754314    | rs32420618 | chr7:19571593  | 1.96E-03 | 0.0400445   |
| H2-Q10      | chr17:35470089-35474563   | rs33061052 | chr17:35078160 | 9.58E-07 | -0.0874375  |
| Apob        | chr12:7977648-8016835     | rs33061052 | chr17:35078160 | 1.74E-02 | 0.131756    |
| Apoe        | chr7:19696109-19699166    | rs33061052 | chr17:35078160 | 3.00E-02 | 0.0868838   |
| Apoc3       | chr9:46232933-46235636    | rs48945377 | chr9:46673334  | 5.56E-04 | -0.0625709  |
| Podxl       | chr6:31519488-31563981    | rs48945377 | chr9:46673334  | 4.09E-03 | 0.0145041   |
| Fetub       | chr16:22918382-22939766   | rs48945377 | chr9:46673334  | 5.47E-03 | 0.0121822   |
| Apoc2       | chr7:19671584-19681423    | rs48945377 | chr9:46673334  | 5.87E-03 | -0.00916968 |
| Itgb3       | chr11:104608000-104670476 | rs48945377 | chr9:46673334  | 1.74E-02 | 0.00912179  |
| Tor3a       | chr1:156653617-156674356  | rs48945377 | chr9:46673334  | 2.64E-02 | 0.00647641  |
| Antxr2      | chr5:97884688-98030962    | rs48945377 | chr9:46673334  | 2.92E-02 | 0.0113798   |
| Tmsb4x      | chrX:167207093-167209315  | rs48945377 | chr9:46673334  | 3.45E-02 | 0.00992826  |
| Plg         | chr17:12378609-12419384   | rs48945377 | chr9:46673334  | 4.13E-02 | 0.0346354   |
| Gc          | chr5:89417511-89457898    | rs48945377 | chr9:46673334  | 4.86E-02 | 0.0194774   |
| Apoa2       | chr1:171225054-171226379  | rs8258227  | chr1:171225758 | 1.32E-22 | -0.41335    |
| Apoc3       | chr9:46232933-46235636    | rs8258227  | chr1:171225758 | 7.15E-03 | 0.0520746   |
| Itgb3       | chr11:104608000-104670476 | rs8258227  | chr1:171225758 | 1.96E-02 | -0.00944052 |

**The Supplementary Tables listed below are submitted as data files.**

**Supplementary Table S1.** Summary of HDL proteins per strain.

**Supplementary Table S5.** The correlations for the HDL metrics.

**Supplemental Table S6.** Association of HDL Proteins with Clinical Traits in HMDP.
